# Supplementary material for: Seasonal variation in landcover estimates reveals sensitivities and opportunities for environmental models
Source: Copernicus journal article supplement (doi:10.5194/egusphere-2023-1171), 2023-09-19
Supplement: Supplementary file 2 [file egusphere-2023-1171-supplement.pdf]

Supporting Information for

**Seasonal variation in landcover estimates reveals sensitivities and opportunities for environmental models**

Daniel T. Myers<sup>1\*</sup>, David Jones<sup>2</sup>, Diana Oviedo-Vargas<sup>1</sup>, John Paul Schmit<sup>2</sup>, Darren L. Ficklin<sup>3</sup>, Xuesong Zhang<sup>4</sup>

<sup>1</sup> Stroud Water Research Center, 970 Spencer Road, Avondale, Pennsylvania 19311, USA

<sup>2</sup> National Park Service National Capital Region Network, 4598 MacArthur Blvd. NW, Washington, DC 20007, USA

<sup>3</sup> Department of Geography, Indiana University Bloomington, Student Building 120, 701 E. Kirkwood Avenue, Bloomington, IN 47405, USA

<sup>4</sup> Hydrology and Remote Sensing Laboratory, United States Department of Agriculture Agricultural Research Service, Bldg. 007, Rm. 104, BARC-West, Beltsville, MD 20705-2350, USA

\* Corresponding author ([dmyers@stroudcenter.org](mailto:dmyers@stroudcenter.org))

**Contents of this file**

Figures S1 to S4

Tables S1 to S4

References

**Introduction**

This supporting information includes supplementary tables and figures from the study. These include diagrams of the modeling approach, background landcover and study area information, model parameters, and the landcover lookup table for the SWAT model.

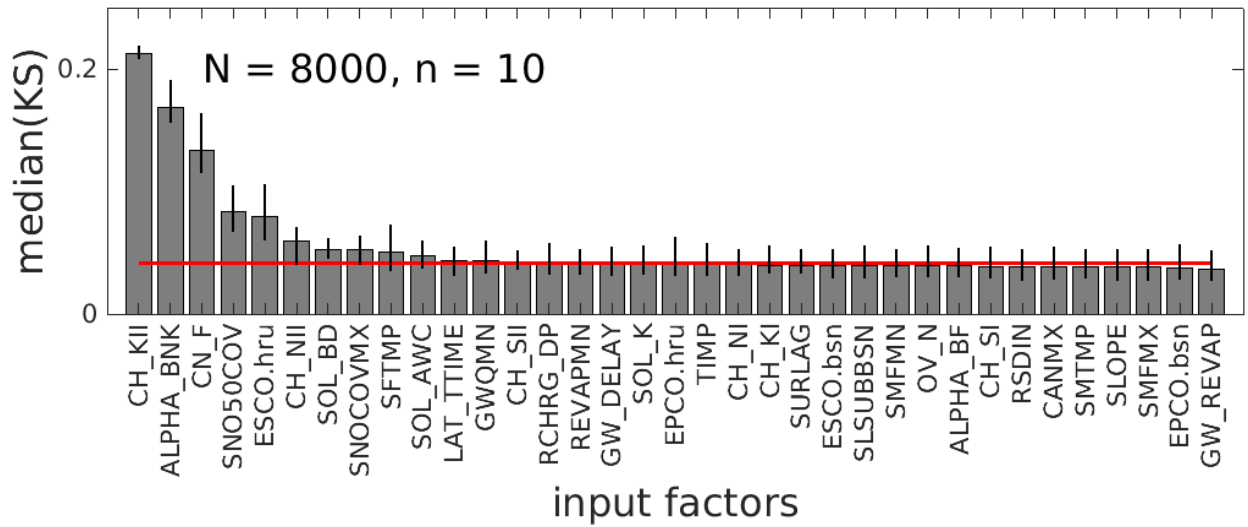

**Figure S1.** PAWN sensitivity analysis results ranking the SWAT parameters from most to least sensitive, using 8,000 samples (N) and conditioning intervals (n) of 10. The red line is the “dummy” parameter and bars are 95% confidence intervals. KS: Kolmogorov-Smirnov statistic. Higher median KS indicates higher sensitivity of SWAT model streamflow output to the parameter.

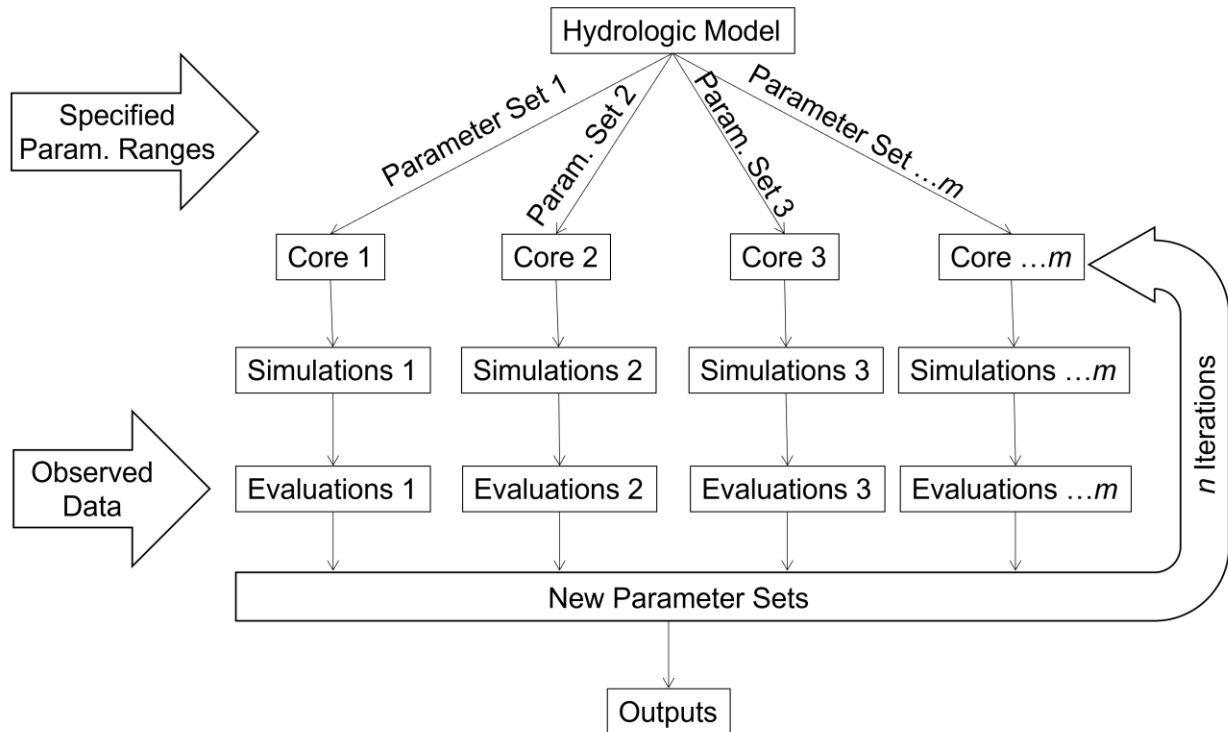

**Figure S2.** Flowchart of the AMALGAM calibration approach used in this study. Parameter sets are randomly generated within specified reasonable ranges of parameter values. Then, hydrologic models are distributed among multiple computer processing cores, simulations are run, and outputs are evaluated for performance against observed streamflow data. The algorithm learns from these outputs and generates new sets of parameter values. This process is iterated and optimal parameter sets are identified based on model evaluations.

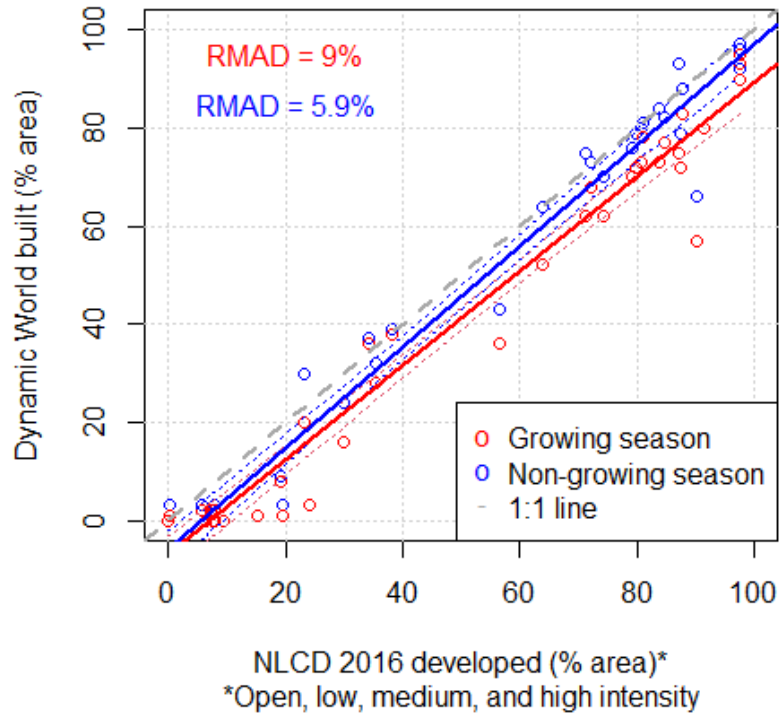

**Figure S3.** Comparison of Dynamic World 2016 built class and National Land Cover Database (NLCD) developed classes as proportions of watershed area for the 37 currently monitored study watersheds, with 95% confidence intervals as dotted lines. RMAD: Relative mean absolute difference.

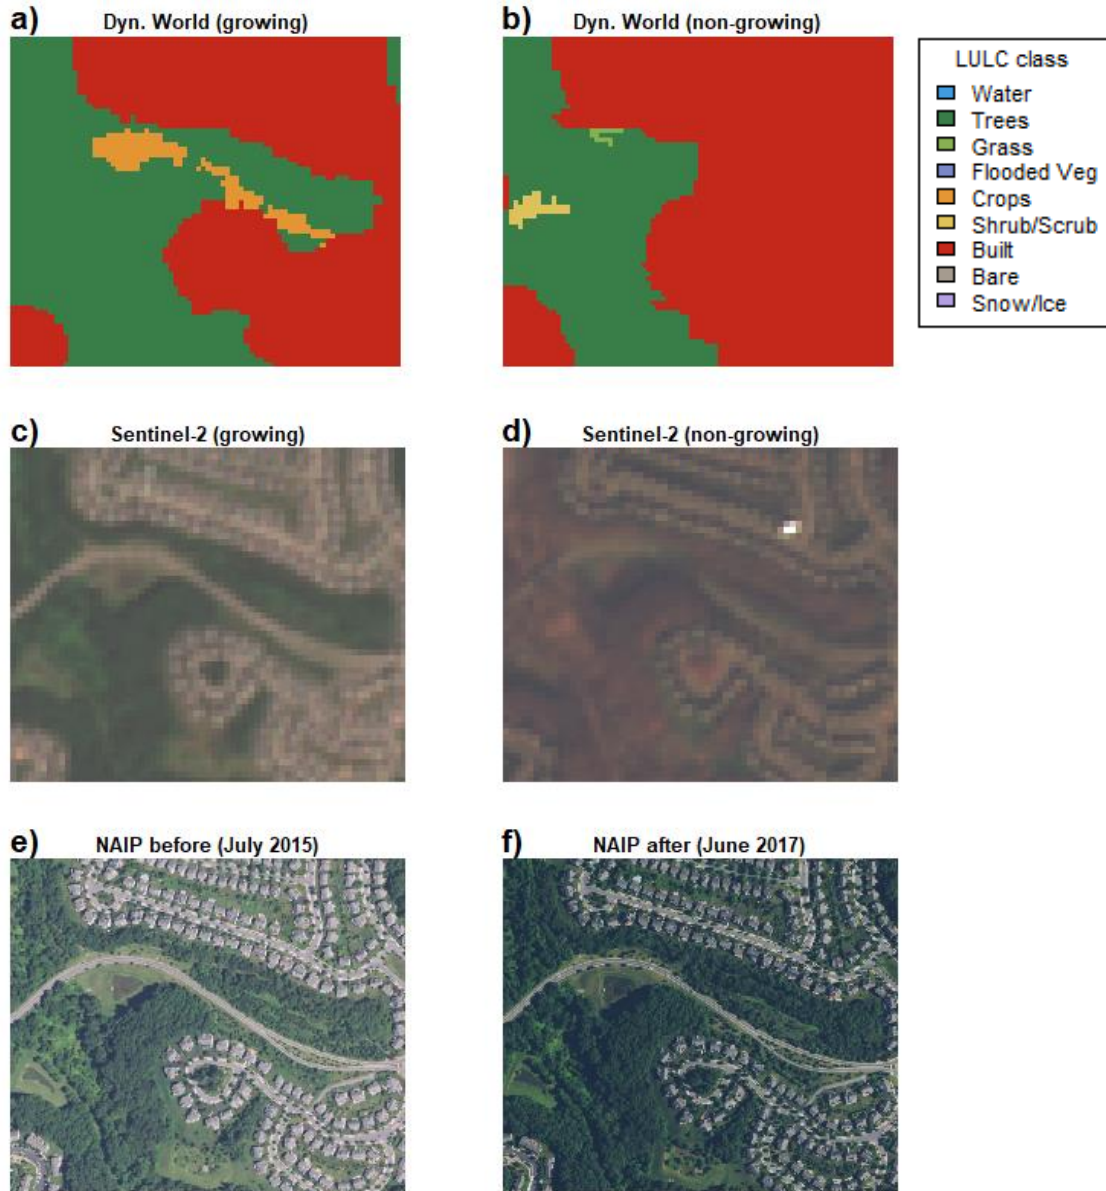

**Figure S4.** Visual comparison of LULC classification in a mixed landuse area of Maryland, USA showing (a,b) differences in Dynamic World data between growing (spring equinox 2016 to autumn equinox 2016) and non-growing (autumn equinox 2015 to spring equinox 2016) seasons. (c,d) Sentinel-2 imagery examples for growing (20 July, 2016) and non-growing (23 November, 2015) seasons. And, (e,f) before-and-after images from the National Agriculture Imagery Program (NAIP).

**Table S1.** Datasets and sources used in model development and comparison. USGS: United States Geological Survey. NOAA: United States National Oceanic and Atmospheric Administration.

| <b>Dataset</b>                                   | <b>Source</b>                            | <b>Citation</b>                    |
|--------------------------------------------------|------------------------------------------|------------------------------------|
| LULC                                             | Dynamic World                            | (Brown et al., 2022)               |
| LULC                                             | National Landcover Database 2016         | (Jin et al., 2019)                 |
| Specific conductance                             | National Capital Region Network          | (Norris et al., 2011)              |
| Watersheds                                       | USGS Streamstats and Whitebox Tools      | (Lindsay, 2022; Ries et al., 2017) |
| Elevation                                        | 3DEP 30 m DEM                            | (Sugarbaker et al., 2014)          |
| Soils                                            | Global Soil Database                     | (Abbaspour et al., 2019)           |
| Streams                                          | WWF HydroSHEDS                           | (Lehner et al., 2006)              |
| Daily precipitation and air temperature          | NOAA weather station USW00093738         | (Leeper et al., 2015)              |
| Daily precipitation and air temperature          | GridMET                                  | (Abatzoglou, 2013)                 |
| Observed streamflow and nitrate-nitrite-nitrogen | USGS NWIS stations 01648010 and 01646000 | (USGS, 2022)                       |

**Table S2.** This LULC lookup table can be read into the QSWAT model so that SWAT uses the Dynamic World LULC image as the LULC input.

| <u>LANDUSE_ID</u> | <u>SWAT_CODE</u> |
|-------------------|------------------|
| 0                 | WATR             |
| 1                 | FRST             |
| 2                 | RNGE             |
| 3                 | WETL             |
| 4                 | AGRL             |
| 5                 | RNGB             |
| 6                 | UCOM             |
| 7                 | SWRN             |
| 8                 | WATR             |

**Table S3.** Parameters used in SWAT model streamflow and nitrate-nitrite-nitrogen calibration for Rock Creek Watershed (Case #2), for models input with growing and non-growing season Dynamic World 2016 data, as well as the model with NLCD 2016 input.

| Symbol        | Definition †                                     | Lower Limit | Upper Limit | Calibrated |
|---------------|--------------------------------------------------|-------------|-------------|------------|
| CH_K2.rte     | Channel hydraulic conductivity (mm/hour) (v)     | 0.1         | 150         | 113        |
| ALPHA_BNK.rte | Bank flow recession constant (v)                 | 0.01        | 1           | 0.91       |
| CN2.mgt       | Runoff curve number (r)                          | -0.25       | 0.25        | -0.15      |
| N_UPDIS.bsn   | Nitrogen update distribution parameter (v)       | 0           | 30          | 20.7       |
| LAT_TTIME.hru | Lateral flow travel time in days (v)             | 0.01        | 180         | 90         |
| SFTMP.bsn     | Snowfall temperature threshold °C (v)            | 0           | 3           | 1.87       |
| CH_N2.rte     | Manning's n value for main channel (v)           | 0.01        | 0.30        | 0.10       |
| NPERCO.bsn    | Nitrogen percolation coefficient (v)             | 0.01        | 1           | 0.14       |
| CDN.bsn       | Denitrification exponential rate coefficient (v) | 0           | 3           | 0.05       |
| SDNCO.bsn     | Denitrification threshold water constant (v)     | 0           | 1.1         | 0.33       |

† A ‘v’ indicates that the original parameter from QSWAT was replaced by the calibrated value, in the same unit. An ‘r’ indicates that the original parameter was modified relatively, multiplying it by 1 + the calibrated value (e.g. a value of -0.2 reduces the original parameter by 20%).



**Table S4.** Proportions of watershed area that were built or developed, agricultural (crops or pasture/hay), or forested LULC categories for the Rock Creek Watershed (Case #2) and Difficult Run Watershed (Case #3).

| LULC type                                | Rock Creek<br>(% area) | Difficult Run<br>(% area) |
|------------------------------------------|------------------------|---------------------------|
| Dyn. World 2016 growing season built     | 57                     | 44                        |
| Dyn. World 2016 non-growing season built | 66                     | 54                        |
| NLCD 2016 open space developed           | 29                     | 30                        |
| NLCD 2016 low intensity developed        | 26                     | 17                        |
| NLCD 2016 medium intensity developed     | 10                     | 8                         |
| NLCD 2016 high intensity developed       | 5                      | 3                         |
| Dyn. World 2016 growing season crops     | 0                      | 0                         |
| Dyn. World 2016 non-growing season crops | 2                      | 1                         |
| NLCD 2016 cultivated crops               | 0                      | 0                         |
| NLCD 2016 pasture/hay                    | 6                      | 2                         |
| Dyn. World 2016 growing season trees     | 38                     | 54                        |
| Dyn. World 2016 non-growing season trees | 26                     | 42                        |
| NLCD 2016 deciduous forest               | 19                     | 27                        |
| NLCD 2016 evergreen forest               | 0                      | 0                         |
| NLCD 2016 mixed forest                   | 1                      | 8                         |

## References:

- Abatzoglou, J. T.: Development of gridded surface meteorological data for ecological applications and modelling, *International Journal of Climatology*, 33, <https://doi.org/10.1002/joc.3413>, 2013.
- Abbaspour, K. C., Vaghefi, S. A., Yang, H., and Srinivasan, R.: Global soil, land use, evapotranspiration, historical and future weather databases for SWAT Applications, *Scientific Data* 2019 6:1, 6, 1–11, <https://doi.org/10.1038/s41597-019-0282-4>, 2019.
- Brown, C. F., Brumby, S. P., Guzder-Williams, B., Birch, T., Hyde, S. B., Mazzariello, J., Czerwinski, W., Pasquarella, V. J., Haertel, R., Ilyushchenko, S., Schwehr, K., Weisse, M., Stolle, F., Hanson, C., Guinan, O., Moore, R., and Tait, A. M.: Dynamic World, Near real-time global 10 m land use land cover mapping, *Scientific Data* 2022 9:1, 9, 1–17, <https://doi.org/10.1038/s41597-022-01307-4>, 2022.
- Jin, S., Homer, C., Yang, L., Danielson, P., Dewitz, J., Li, C., Zhu, Z., Xian, G., and Howard, D.: Overall Methodology Design for the United States National Land Cover Database 2016 Products, *Remote Sensing* 2019, Vol. 11, Page 2971, 11, 2971, <https://doi.org/10.3390/RS11242971>, 2019.
- Leeper, R. D., Rennie, J., and Palecki, M. A.: Observational Perspectives from U.S. Climate Reference Network (USCRN) and Cooperative Observer Program (COOP) Network: Temperature and Precipitation Comparison, *J Atmos Ocean Technol*, 32, 703–721, <https://doi.org/10.1175/JTECH-D-14-00172.1>, 2015.
- Lehner, B., Verdin, K., and Jarvis, A.: HydroSHEDS Technical Documentation, [https://data.hydrosheds.org/file/technical-documentation/HydroSHEDS\\_TechDoc\\_v1\\_4.pdf](https://data.hydrosheds.org/file/technical-documentation/HydroSHEDS_TechDoc_v1_4.pdf) (accessed 15 May 2023), World Wildlife Fund, Washington, DC, 2006.
- Lindsay, J. B.: The Whitebox Geospatial Analysis Tools Project and Open-Access GIS, 2022.
- Norris, M., Pieper, J., Watts, T., and Cattani, A.: National Capital Region Network Inventory and Monitoring Program Water Chemistry and Quantity Monitoring Protocol Version 2.0 Water chemistry, nutrient dynamics, and surface water dynamics vital signs, *Natural Resource Report NPS/NCRN/NRR—2011/423*, 2011.
- Ries, K. G., Newson, J. K., Smith, M. J., Guthrie, J. D., Steeves, P. A., Haluska, T., Kolb, K., Thompson, R. F., Santoro, R. D., and Vraga, H. W.: StreamStats, version 4, US Geological Survey, <https://doi.org/10.3133/FS20173046>, 2017.
- Sugarbaker, L. J., Constance, E. W., Heidemann, H. K., Jason, A. L., Lukas, V., Saghy, D. L., and Stoker, J. M.: USGS Circular 1399: The 3D Elevation Program Initiative— A Call for Action, <https://pubs.usgs.gov/circ/1399/> (accessed 16 May 2023), 2014.
- USGS: National Water Information System data available on the World Wide Web (USGS Water Data for the Nation), United States Geological Survey, <https://waterdata.usgs.gov/nwis/rt> (accessed 16 May 2023), 2022.
